# Supplementary material for: Enhanced cortical neural stem cell identity through short SMAD and WNT inhibition in human cerebral organoids facilitates emergence of outer radial glial cells
Source: PubMed Central journal article supplement (PMC9203281; doi:10.1038/s41556-022-00929-5), 2022-06-13
Supplement: 41556_2022_929_MOESM1_ESM.pdf [file 41556_2022_929_MOESM1_ESM.pdf]

---

**Supplementary information**

---

**Enhanced cortical neural stem cell identity through short SMAD and WNT inhibition in human cerebral organoids facilitates emergence of outer radial glial cells**

---

In the format provided by the authors and unedited

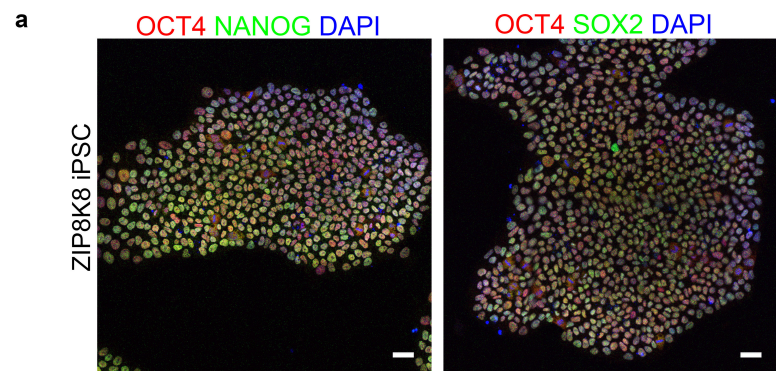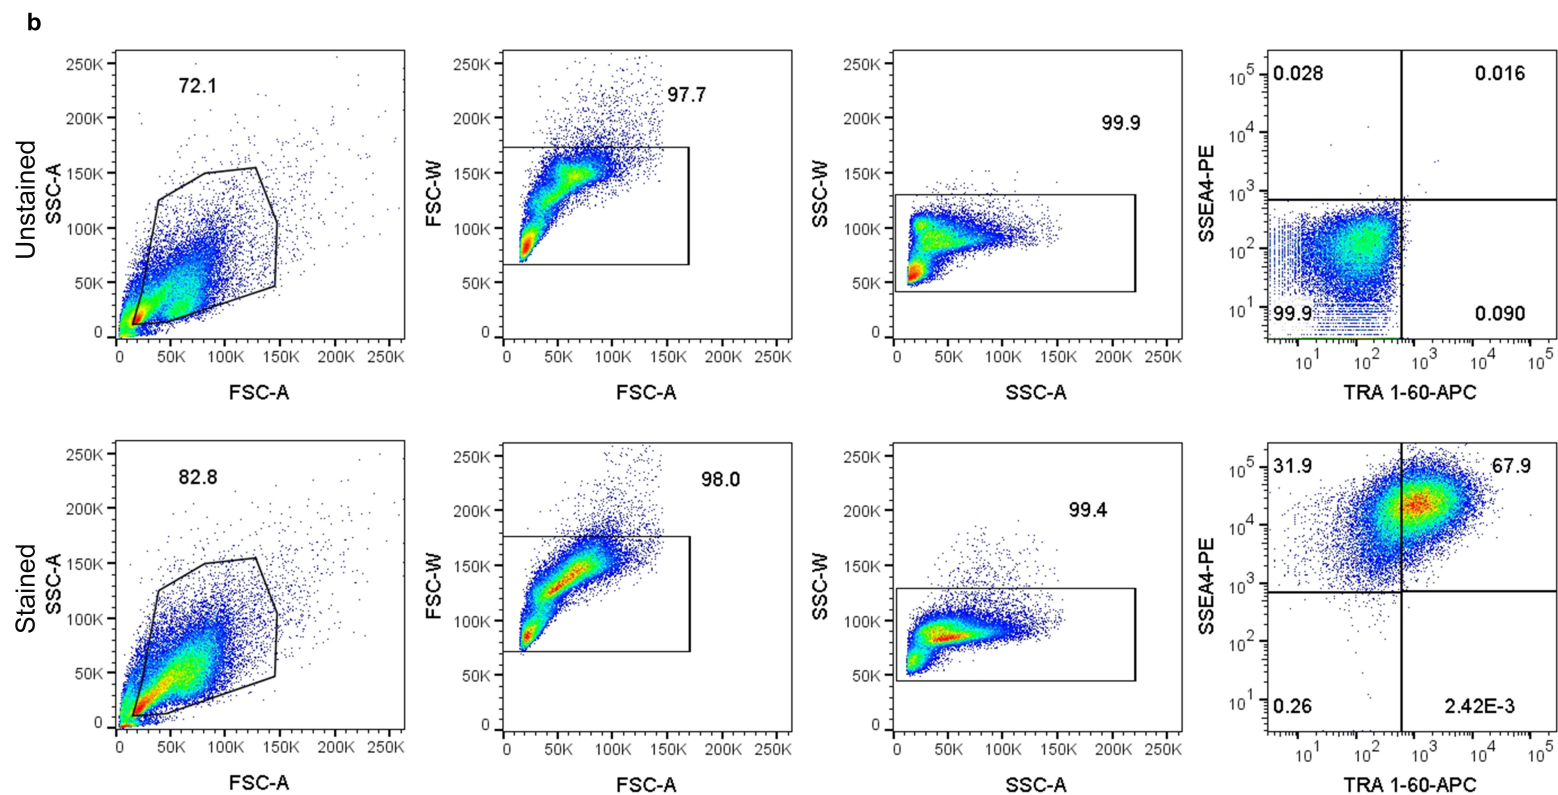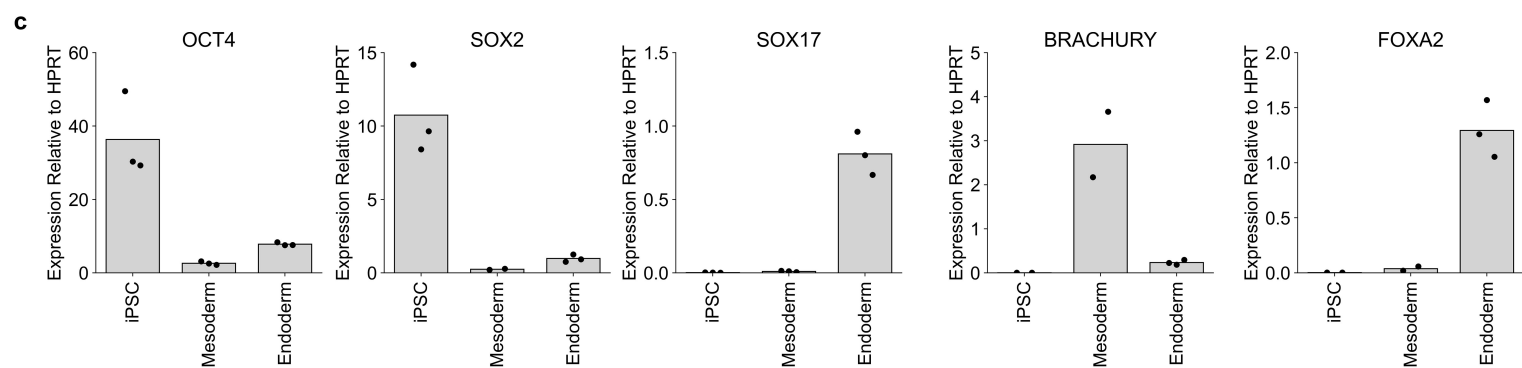

## Supplementary Figure 1: ZIP8K8 iPSC Line Characterization

- a.** Immunostainings of pluripotency markers OCT4 and NANOG as well as OCT4 and SOX2 in undifferentiated ZIP8K8 iPSCs across N=3 colonies. Scale bar: 50  $\mu\text{m}$ .
- b.** Flow cytometry forward (FSC) versus side scatter (SSC) density plots were first used to exclude debris and to gate for the iPSC population. Then, singlets were selected based on FSC-area versus FSC-width, and SSC-area versus SSC-width. An unstained sample was used to set the appropriate negative gates and was copied to the sample stained for SSEA4 and TRA 1-60. The frequency of cells within each selected gate is shown.
- c.** Quantitative PCR (qPCR) analysis of *OCT4* (N=3 replicates for each lineage), *SOX2* (N=3 replicates for iPSC and endoderm lineage, N=2 replicates for mesoderm lineage), *BRACHURY* (N=2 replicates for iPSC and mesoderm lineage, N=3 replicates for endoderm lineage), *FOXA2* (N=2 replicates for iPSC and mesoderm lineages, N=3 replicates for endoderm lineage) and *SOX17* (N=3 replicates for all lineages) transcript levels obtained for undifferentiated iPSC and following a five-day differentiation in to mesoderm and endoderm lineages using the STEMdiff™ Tri-lineage Differentiation Kit. Bars represent mean.
